# Supplementary material for: Lung Ultrasound to Determine the Effect of Lower vs. Higher PEEP on Lung Aeration in Patients without ARDS—A Substudy of a Randomized Clinical Trial
Source: MDPI journal article supplement (doi:10.3390/diagnostics13121989), 2023-06-07

**Figure S1.** Lung ultrasound score. Each LUS image was scored with the LUS aeration score: (A) normal aeration: presence of lung sliding with A lines or  $\leq 2$  isolated B lines (0 point); (B1) moderate loss of aeration: B-lines are well-spaced and cover  $\leq 50\%$  of the pleural line (1 point); (B2) severe loss of lung aeration: B-lines cover  $> 50\%$  of the pleural line (2 points); (C) consolidated lung tissue: hypoechoic or tissue-like area (3 points).

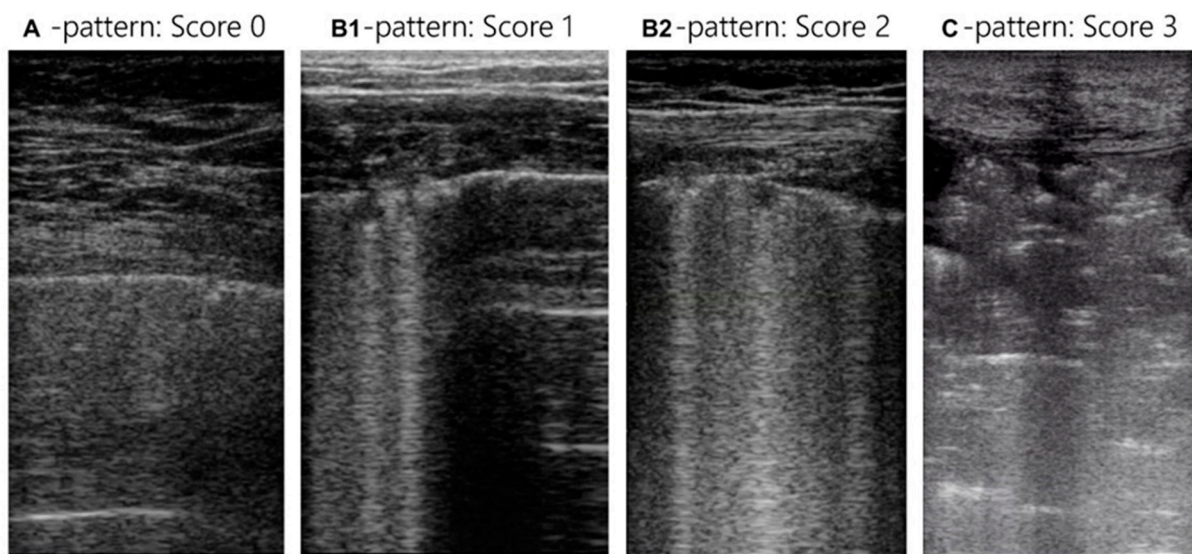

Supplement: s1 [file s1]
